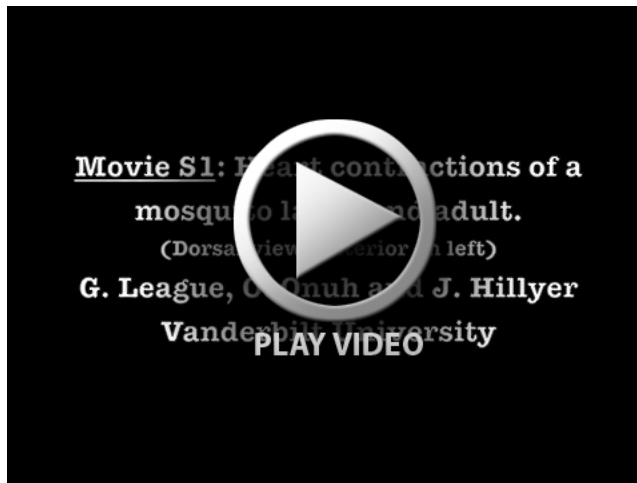

**Movie 1.** Heart contractions of a mosquito larva and adult.

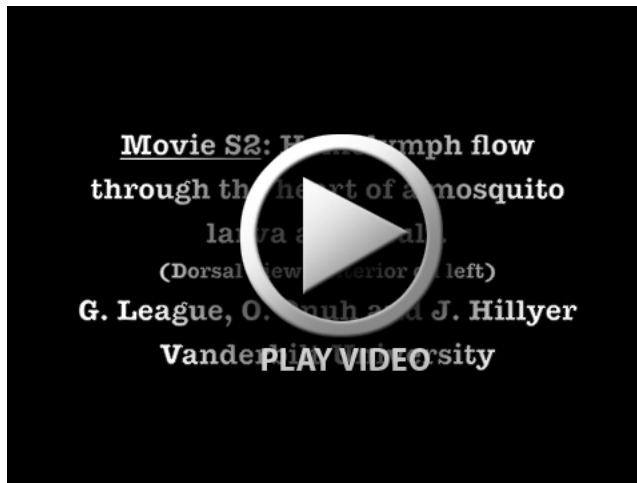

**Movie 2.** Hemolymph flow through the heart of a mosquito larva and adult.

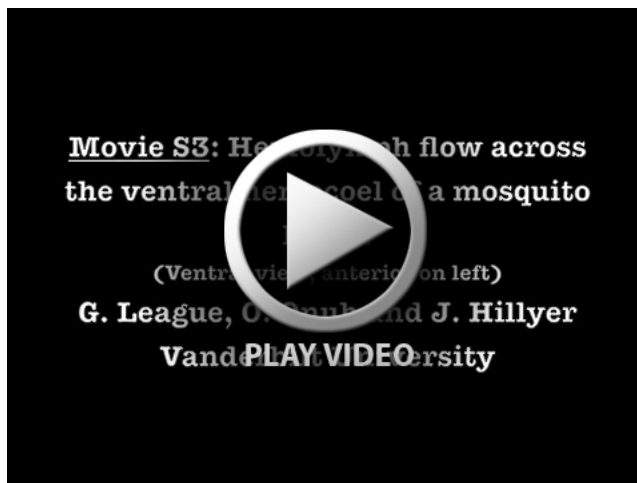

**Movie 3.** Hemolymph flow across the ventral hemocoel of a mosquito larva.

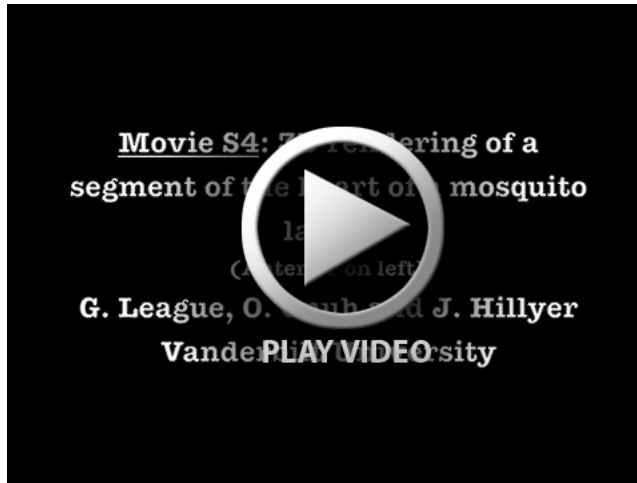

**Movie 4.** 3D rendering of a segment of the heart of a mosquito larva.

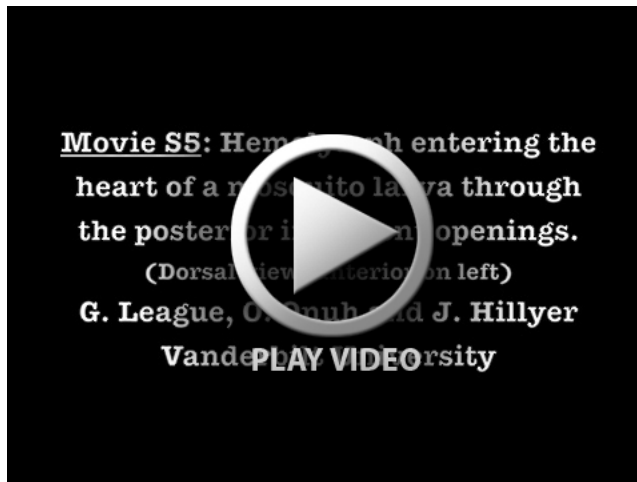

**Movie 5.** Hemolymph entering the heart of a mosquito larva through the posterior incurrent openings.

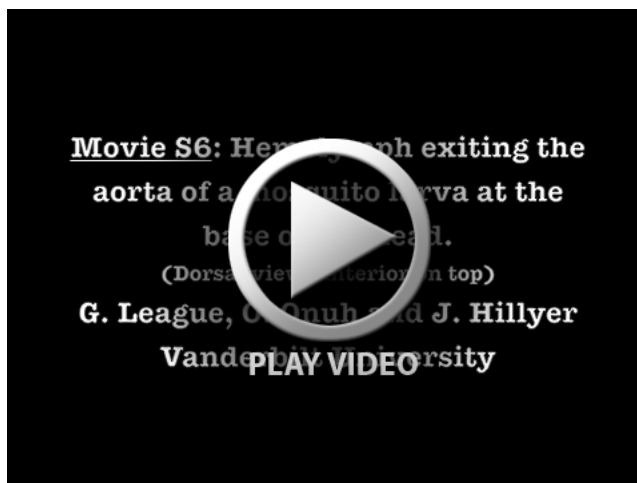

**Movie 6.** Hemolymph exiting the aorta of a mosquito larva at the base of the head.
